# Supplementary material for: Enhancing the electrocatalytic activity of metal–organic frameworks in the oxygen evolution reaction by introducing high-valent metal centers
Source: Royal Society of Chemistry journal article supplement (doi:10.1039/d3ta01869e), 2023-01-01
Supplement: d3ta01869e1.pdf [file d3ta01869e1.pdf]

## Supplementary Information

### Enhancing Electrocatalytic Activity of Metal-Organic Frameworks in Oxygen Evolution Reaction by Introducing High-Valent Metal Centers†

Jie Dong, ‡<sup>a</sup> Danil W. Boukhvalov, ‡<sup>be</sup> Cuncai Lv, <sup>c</sup> Mark G Humphrey, <sup>d</sup> Chi Zhang <sup>\*a</sup> and Zhipeng Huang <sup>\*a</sup>

<sup>a</sup>China-Australia Joint Research Center for Functional Molecular Materials, School of Chemical Science and Engineering, Tongji University, Shanghai, 200092, China. Email: chizhang@tongji.edu.cn, zphuang@tongji.edu.cn

<sup>b</sup>College of Science, Nanjing Forestry University, Nanjing 210037, China

<sup>c</sup>Key Laboratory of High-precision Computation and Application of Quantum Field Theory of Hebei Province, Hebei Key Lab of Optic-electronic Information and Materials, The College of Physics Science and Technology, Hebei University, Baoding 071002, China

<sup>d</sup>Research School of Chemistry, Australian National University, Canberra, ACT, 2601, Australia

<sup>e</sup>Institute of Physics and Technology, Ural Federal University, Mira Str. 19, 620002 Yekaterinburg, Russia

‡ These authors contributed equally

**The specific steps of DFT modeling are as follows:**

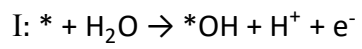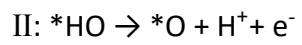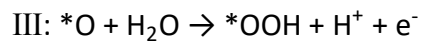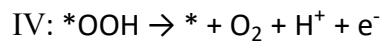

## Content

- Fig. S1** Optical images of (a) Ni-HHTP-MH and (b) Ni-HHTP-CH.
- Fig. S2** SEM images of Ni-HHTP-CH.
- Fig. S3** The pore size distribution curves of the Ni-HHTP-MH.
- Fig. S4** (a) The N<sub>2</sub> sorption/desorption isotherms and (b) pore size distribution curves of the Ni-HHTP-CH.
- Fig. S5** XPS survey spectra of the obtained Ni-HHTP-CH and Ni-HHTP-MH.
- Fig. S6** High-resolution O 1s XPS spectra of the Ni-HHTP-CH and Ni-HHTP-MH.
- Fig. S7** Magnetic susceptibility of Ni-HHTP-MH and Ni-HHTP-CH.
- Fig. S8** XRD patterns of Ni-HHTP-CH synthesized at different heating temperatures.
- Fig. S9** SEM images of Ni-HHTP-CH synthesized at different heating temperatures: (a) 75 °C and (b) 105 °C.
- Fig. S10** XRD patterns of Ni-HHTP-CH synthesized at different heating times.
- Fig. S11** SEM images of Ni-HHTP-CH synthesized at different heating times: (a) 6 h and (b) 24 h.
- Fig. S12** LSV curves of Ni-HHTP-CH synthesized at different heating temperatures.
- Fig. S13** LSV curves of Ni-HHTP-CH synthesized at different heating times.
- Fig. S14** XRD patterns of Ni-HHTP-MH synthesized at different microwave heating temperatures.
- Fig. S15** SEM images of Ni-HHTP-MH synthesized at different microwave heating temperatures: (a) 65 °C, (b) 70 °C, (c) 85 °C and (a) 105 °C.
- Fig. S16** XRD patterns of Ni-HHTP-MH synthesized at different microwave heating times.
- Fig. S17** SEM images of Ni-HHTP-MH synthesized at different microwave heating times: (a) 3 h and (b) 5 h.
- Fig. S18** LSV curves of Ni-HHTP-MH synthesized at different microwave heating temperatures.
- Fig. S19** LSV curves of Ni-HHTP-MH synthesized at different microwave heating times.
- Fig. S20** The equivalent circuit model for electrochemical impedance tests.
- Fig. S21** Cyclic voltammogram of Ni-HHTP-CH in 1.0 M KOH solutions at various scan rates within a potential range of 1.15-1.25 V.
- Fig. S22** Cyclic voltammogram of Ni-HHTP-MH in 1.0 M KOH solutions at various scan rates within a potential range of 1.15-1.25 V.
- Fig. S23** Diagram of theoretical and detected O<sub>2</sub> volume at a constant current density of 20 mA cm<sup>-2</sup> in 1.0 M KOH.
- Fig. S24** XRD patterns of Ni-HHTP-MH before and after the OER durability test.
- Fig. S25** SEM images of Ni-HHTP-MH before and after the OER durability test.
- Fig. S26** High-resolution Ni 2p XPS spectra of (a) the Ni-HHTP-CH and (b) the Ni-HHTP-MH before and after the OER test.
- Fig. S27** High-resolution O 1s XPS spectra of (a) the Ni-HHTP-CH and (b) the Ni-HHTP-MH before and after the OER test.
- Fig. S28** Overall water splitting performances of Ni-HHTP-MH || Pt/C in 1 M KOH.
- Fig. S29** Optimized geometrical structures of (a) Ni-HHTP-CH and (b) Ni-HHTP-MH.
- Fig. S30** LSV curves of (a) the Ni-HHTP-CH and (b) the Ni-HHTP-MH; (c) Cyclic voltammetry curves of Ni-HHTP-MH and Ni-HHTP-CH.

**Fig. S31** Cyclic voltammetry for Ni(OH)<sub>2</sub> at the potential range of 0.6–1.8 V.

**Fig. S32** XRD patterns of Co-HHTP-CH and Fe-HHTP-CH.

**Fig. S33** SEM images of Co-HHTP-MH and Fe-HHTP-MH.

**Fig. S34** SEM images of Co-HHTP-CH and Fe-HHTP-CH.

**Fig. S35** High-resolution Fe 2p XPS spectra of Fe-HHTP-MH and Fe-HHTP-CH.

**Fig. S36** High-resolution Co 2p XPS spectra of Co-HHTP-MH and Co-HHTP-CH.

**Fig. S37** LSV curves of Co-HHTP-MH, Fe-HHTP-MH, Co-HHTP-CH and Fe-HHTP-CH.

**Fig. S38**  $\eta_{10}$  and  $\eta_{100}$  of Co-HHTP-MH, Fe-HHTP-MH, Co-HHTP-CH and Fe-HHTP-CH.

**Table S1** The EIS results of Ni-HHTP-MH and Ni-HHTP-CH in 1.0 M KOH solution.

**Table S2** TOF was calculated from the ICP results.

**Table S3** Comparisons of the recently reported OER electrocatalysts based on metal-organic frameworks in alkaline solution.

**Table S4** Comparisons of OER performance of our catalysts to the most active catalysts reported recently in alkaline solution.

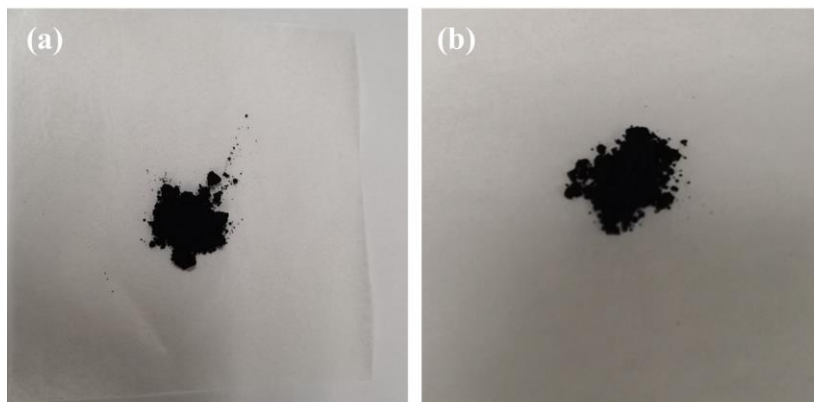

**Fig. S1** Optical images of Ni-HHTP-CH and Ni-HHTP-MH.

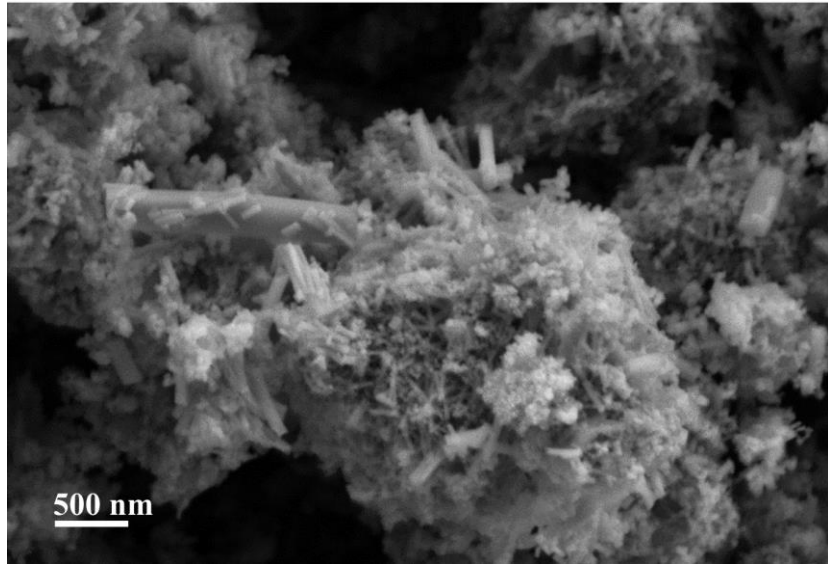

**Fig. S2** SEM images of Ni-HHTP-CH.

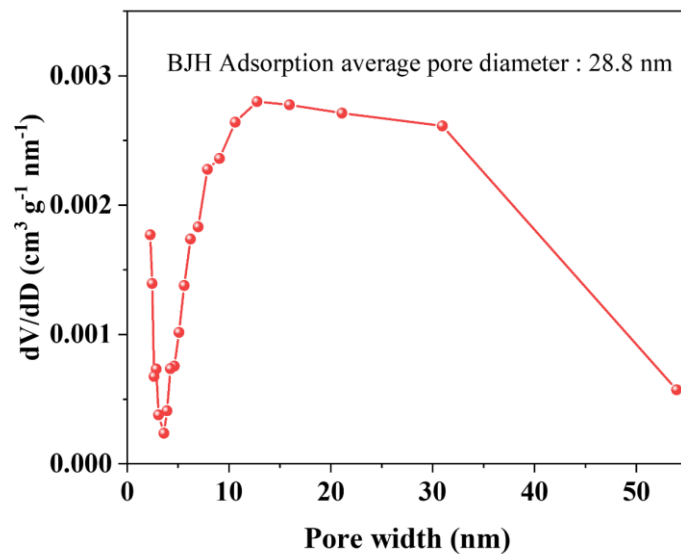

**Fig. S3** The pore size distribution curves of the Ni-HHTP-MH.

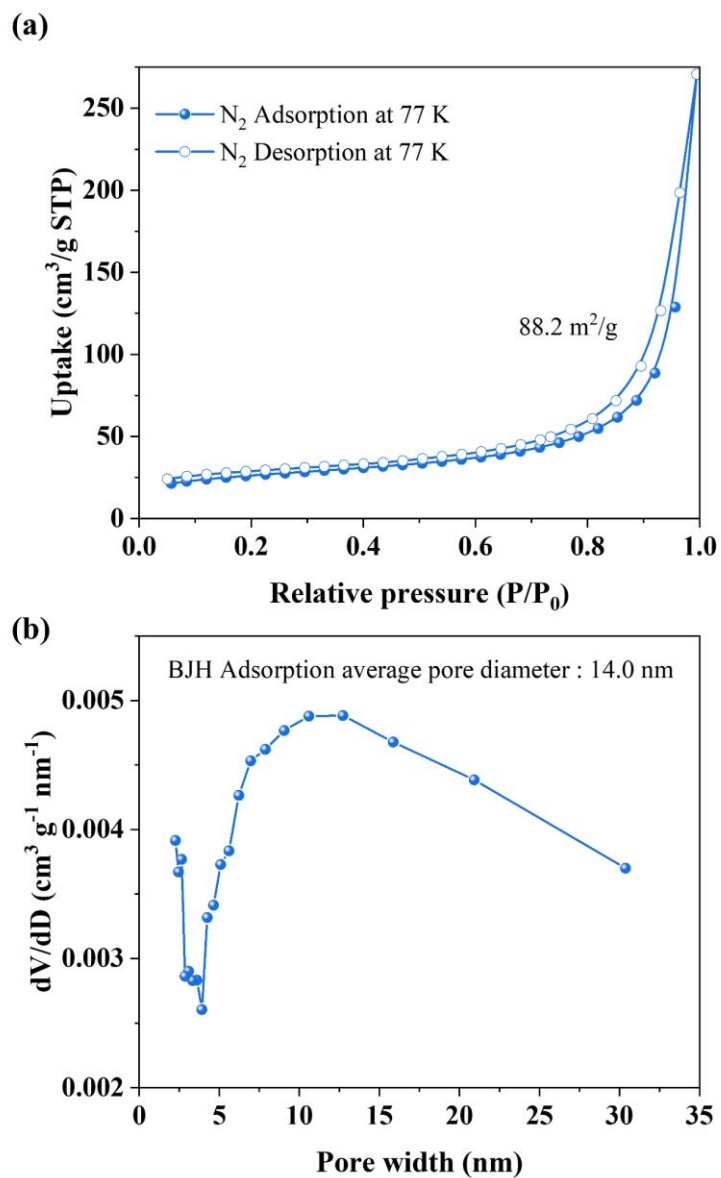

**Fig. S4** (a) The  $\text{N}_2$  sorption/desorption isotherms and (b) pore size distribution curves of the Ni-HHTTP-CH.



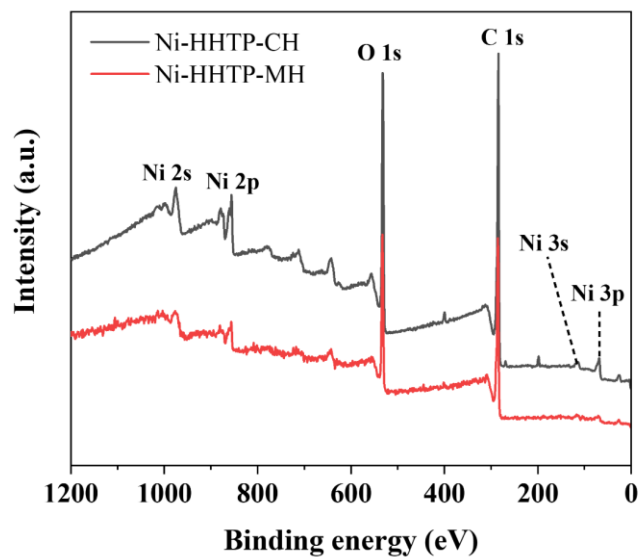

**Fig. S5** XPS survey spectra of the Ni-HHTP-CH and Ni-HHTP-MH.

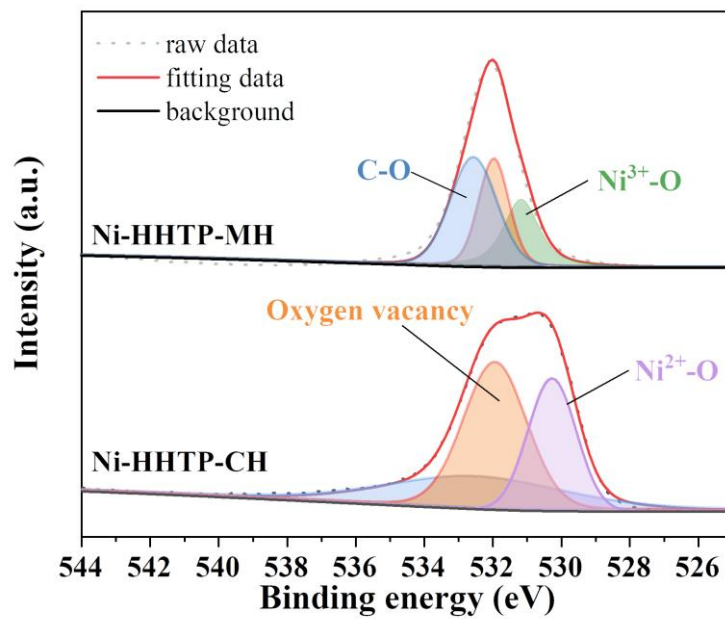

**Fig. S6** High-resolution O 1s XPS spectra of the Ni-HHTP-CH and Ni-HHTP-MH.

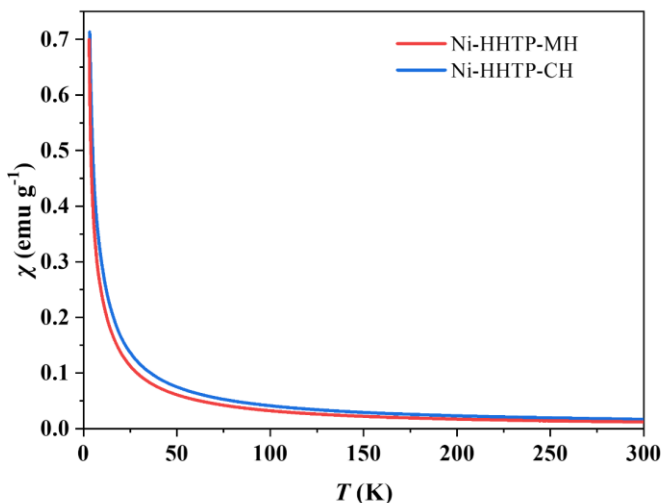

**Fig. S7** Magnetic susceptibility of Ni-HHTP-MH and Ni-HHTP-CH.

The total effective magnetic moment ( $\mu_{\text{eff}}$ ) can be obtained by fitting the  $\chi^{-1}$ - $T$  curve according to Langevin theory. The number of unpaired  $d$  electrons is further calculated using  $\chi^{-1}$ - $T$  and is denoted as  $n$ . The calculated  $\mu_{\text{eff}}$  values for Ni-HHTP-MH and Ni-HHTP-CH are  $2.83 \mu_{\text{B}}$  and  $3.57 \mu_{\text{B}}$ , respectively, and Ni ions and radicals contribute both.<sup>1</sup> The magnetic moments ( $\mu$ ) of Ni ions and radicals are abbreviated as  $\mu_{\text{Ni}}$  and  $\mu_{\text{rad}}$ , respectively, by the equation:  $\mu_{\text{eff}}^2 = \mu_{\text{Ni}}^2 + \mu_{\text{rad}}^2$ , the  $\mu_{\text{Ni}}$  for Ni-HHTP-MH and Ni-HHTP-CH are derived as  $1.77 \mu_{\text{B}}$  and  $2.81 \mu_{\text{B}}$ , respectively. Because each building unit of Ni-HHTP contributes 1.33 radicals<sup>2</sup>,  $\mu_{\text{rad}}$  for Ni-HHTP can be calculated as  $2.10 \mu_{\text{B}}$ . According to the formula:  $\mu = \sqrt{n(n+2)}$ , the calculated  $n$  for Ni-HHTP-MH and Ni-HHTP-CH are 1.03 and 2.00, respectively.

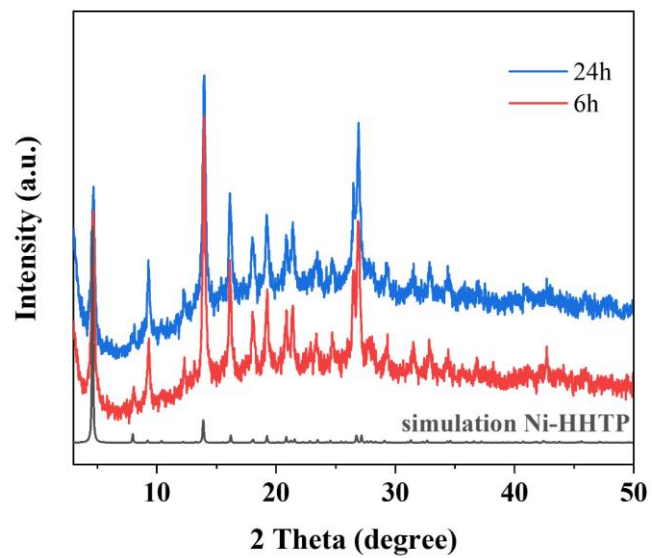

**Fig. S8** XRD patterns of Ni-HHTP-CH synthesized at different heating temperatures.

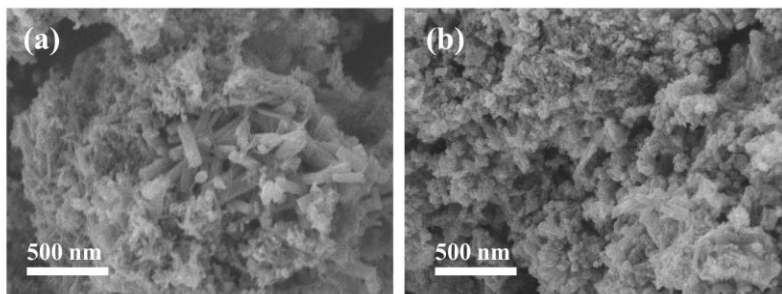

**Fig. S9** SEM images of Ni-HHTP-CH synthesized at different heating temperatures: (a) 75 °C and (b) 105 °C.

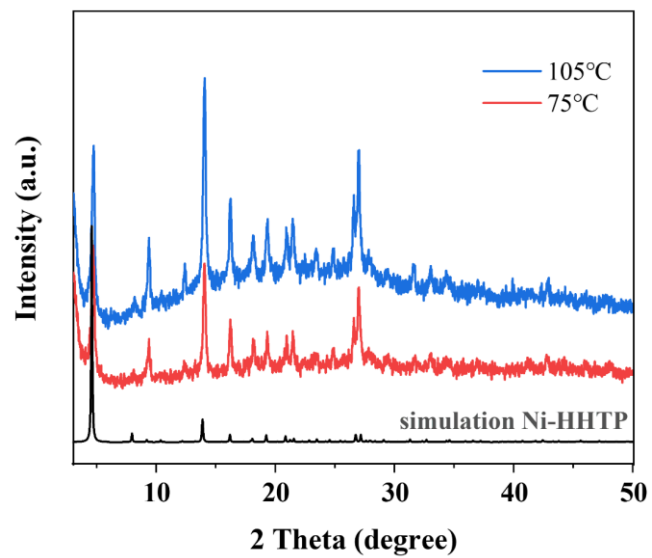

**Fig. S10** XRD patterns of Ni-HHTP-CH synthesized at different heating times.

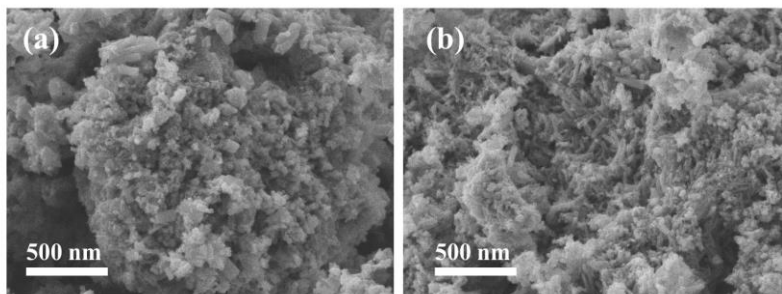

**Fig. S11** SEM images of Ni-HHTP-CH synthesized at different heating times: (a) 6 h and (b) 24 h.

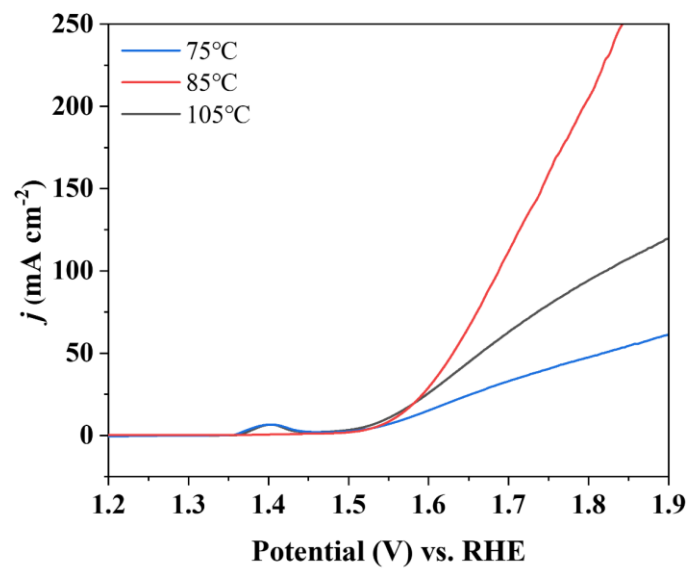

**Fig. S12** LSV curves of Ni-HHTP-CH synthesized at different heating temperatures.



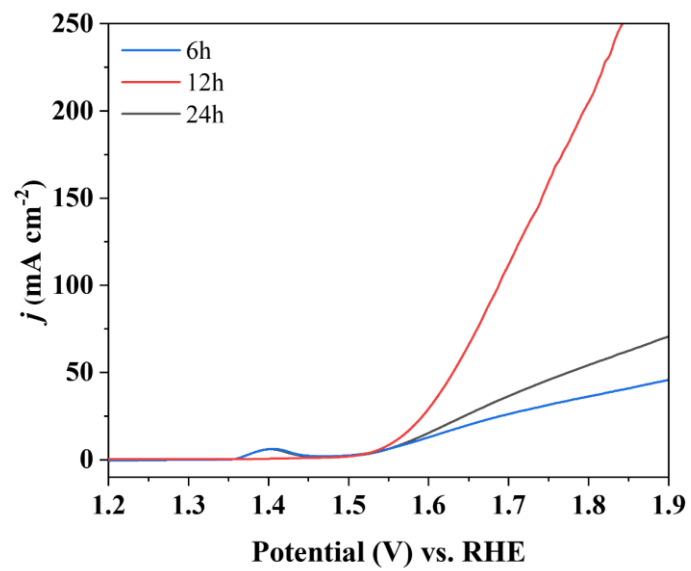

**Fig. S13** LSV curves of Ni-HHTP-CH synthesized at different heating times.

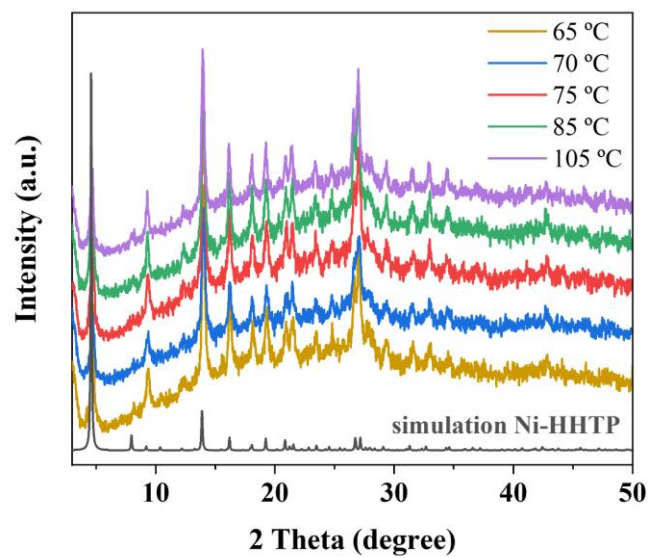

**Fig. S14** XRD patterns of Ni-HHTP-MH synthesized at different microwave heating temperatures.

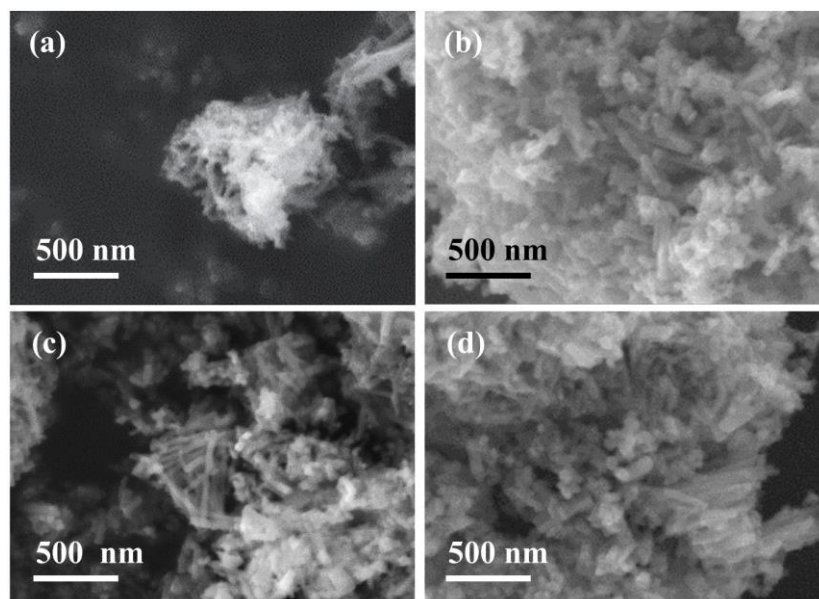

**Fig. S15** SEM images of Ni-HHTP-MH synthesized at different microwave heating temperatures: (a) 65 °C, (b) 70 °C, (c) 85 °C and (a) 105 °C.

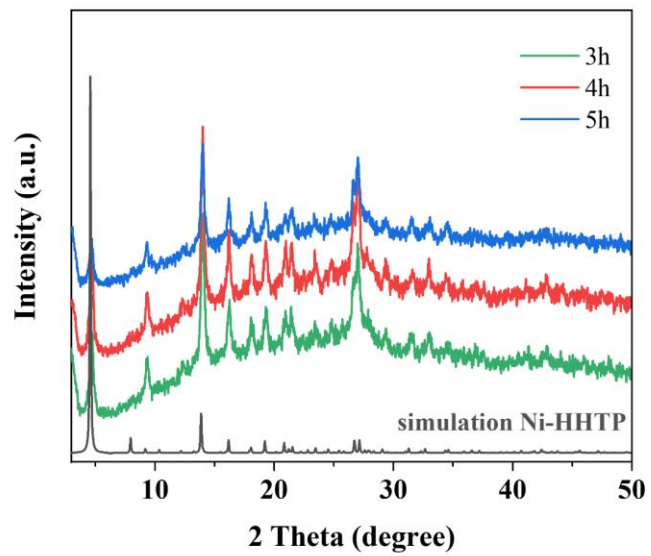

**Fig. S16** XRD patterns of Ni-HHTP-MH synthesized at different microwave heating times.

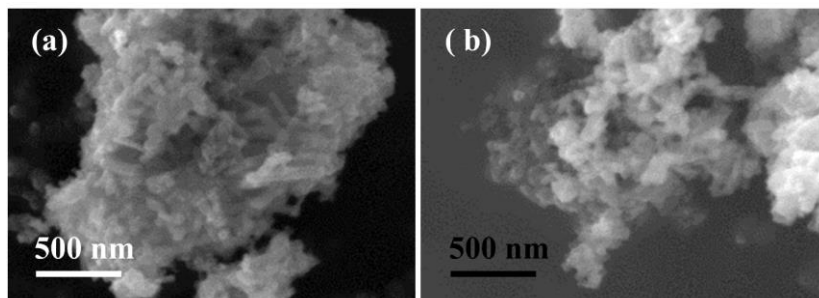

**Fig. S17** SEM images of Ni-HHTP-MH synthesized at different microwave heating times: (a) 3 h and (b) 5 h.

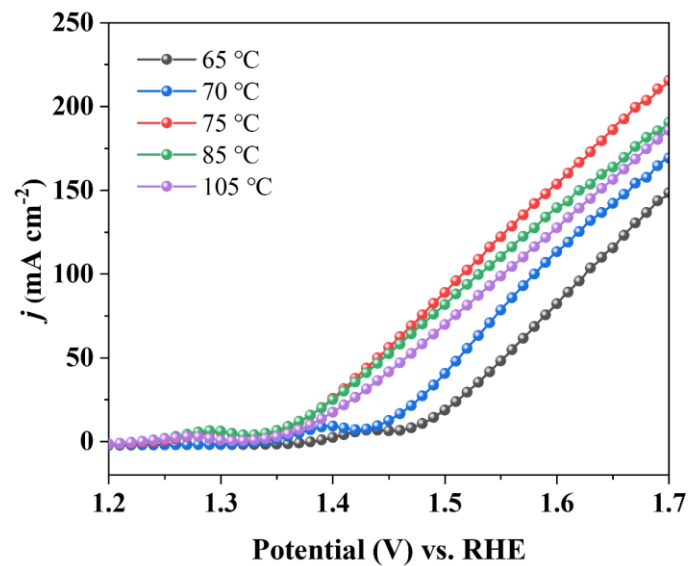

**Fig. S18** LSV curves of Ni-HHTP-MH synthesized at different microwave heating temperatures.

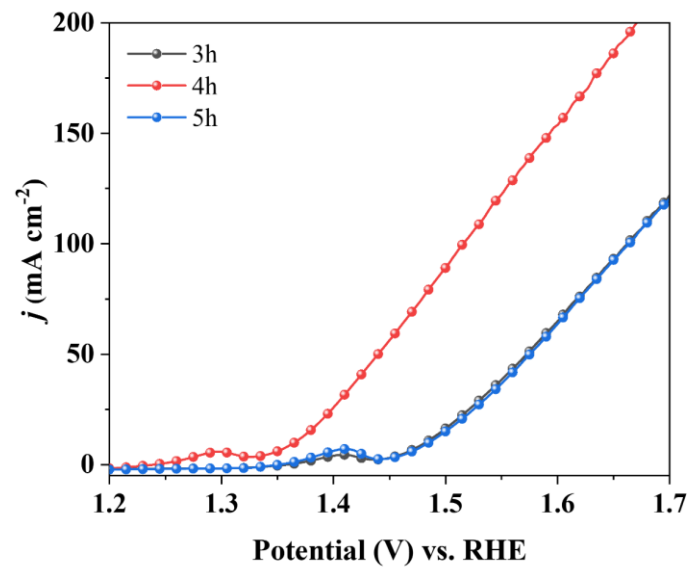

**Fig. S19** LSV curves of Ni-HHTP-MH synthesized at different microwave heating times.

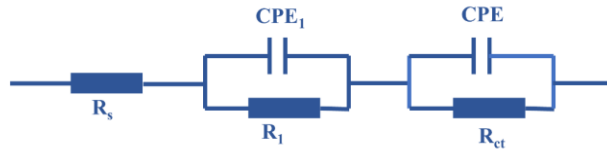

**Fig. S20** The equivalent circuit model for electrochemical impedance tests.  $R_s$ ,  $R_1$ , and  $R_{ct}$  represent the resistances of the electrolyte, electrode porosity, and charge transfer, respectively. The constant phase angle element (CPE) represents the double-layer capacitance of a solid electrode in a real-world situation.



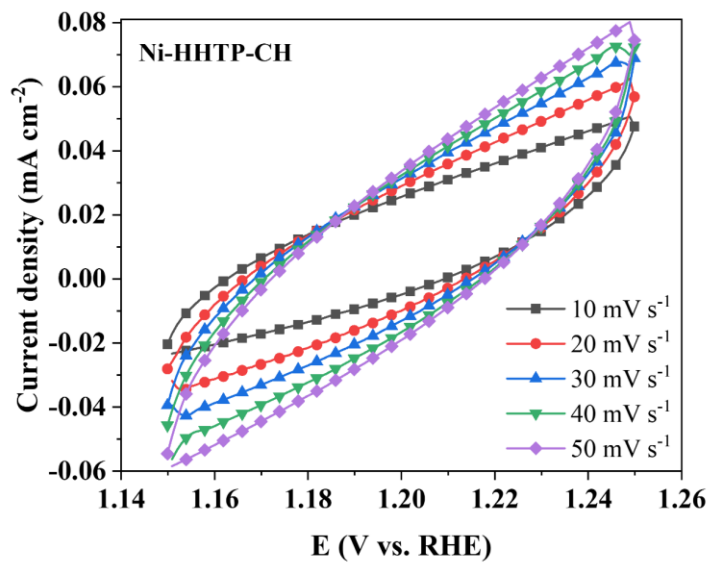

**Fig. S21** Cyclic voltammogram of Ni-HHTP-CH in 1.0 M KOH solutions at various scan rates within a potential range of 1.15-1.25 V.

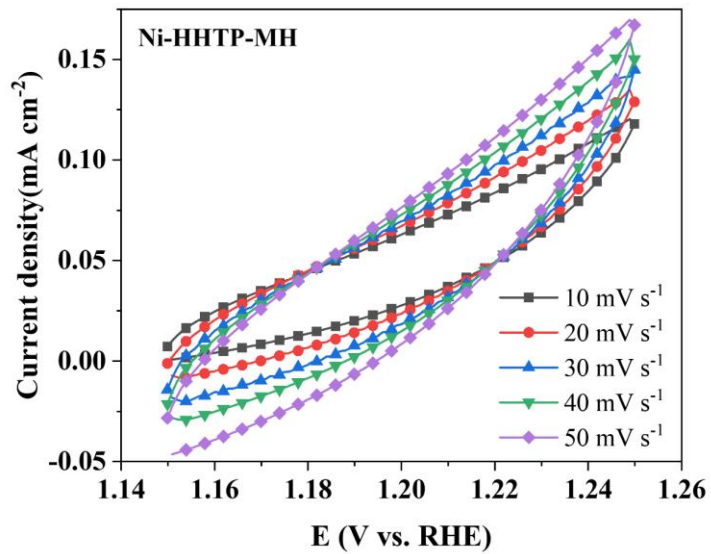

**Fig. S22** Cyclic voltammogram of Ni-HHTP-MH in 1.0 M KOH solutions at various scan rates within a potential range of 1.15-1.25 V.

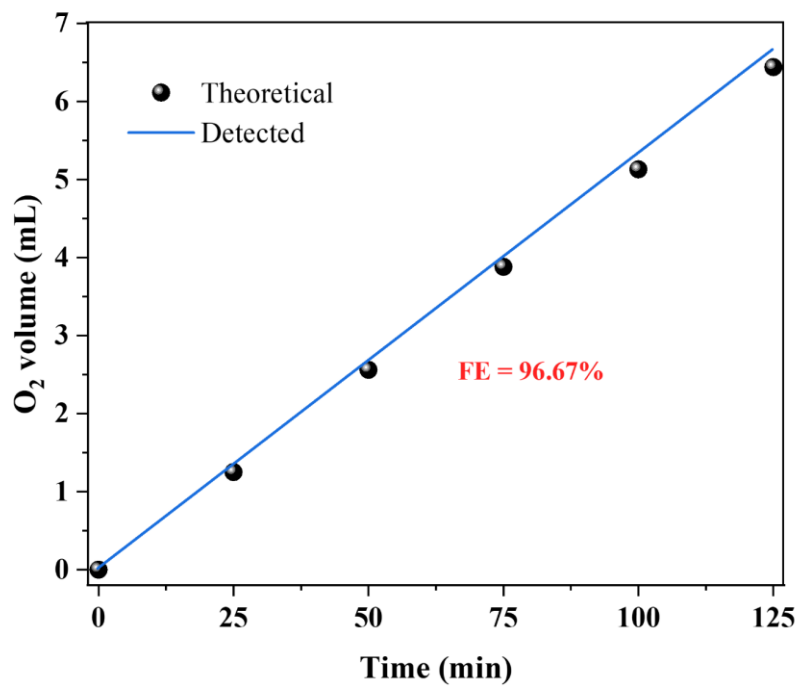

**Fig. S23** Diagram of theoretical and detected O<sub>2</sub> volume at a constant current density of 20 mA cm<sup>-2</sup> in 1.0 M KOH.

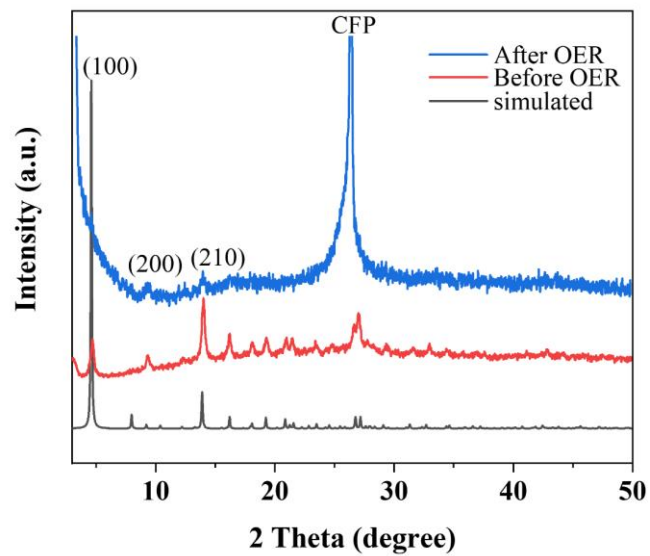

**Fig. S24** XRD patterns of Ni-HHTP-MH before and after the OER durability test.

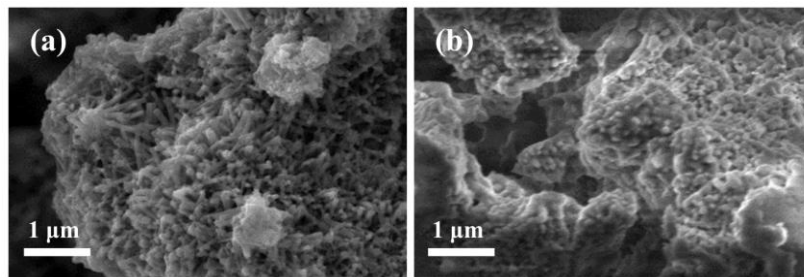

**Fig. S25** SEM images of Ni-HHTP-MH before and after the OER durability test.

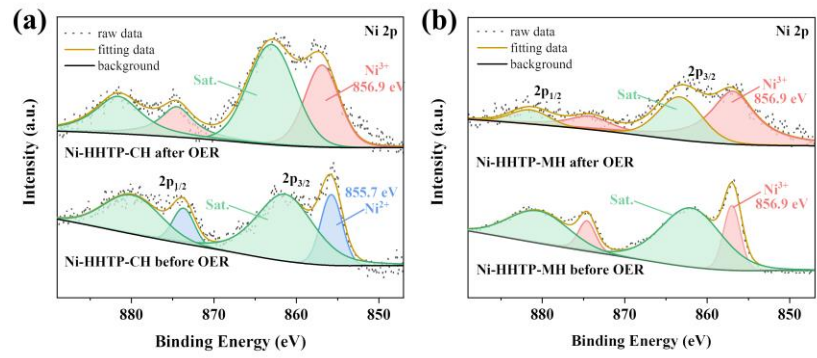

**Fig. S26** High-resolution Ni 2p XPS spectra of (a) the Ni-HHTP-CH and (b) the Ni-HHTP-MH before and after the OER test.

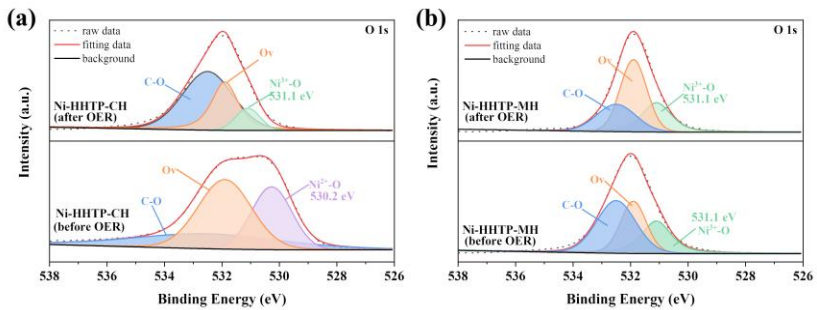

**Fig. S27** High-resolution O 1s XPS spectra of (a) the Ni-HHTP-CH and (b) the Ni-HHTP-MH before and after the OER.

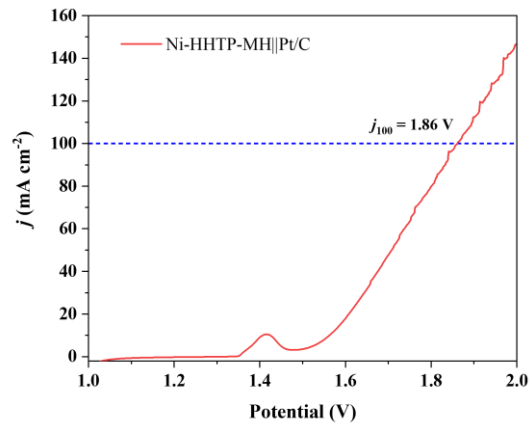

**Fig. S28** Overall water splitting performances of Ni-HHTP-MH | Pt/C in 1 M KOH.



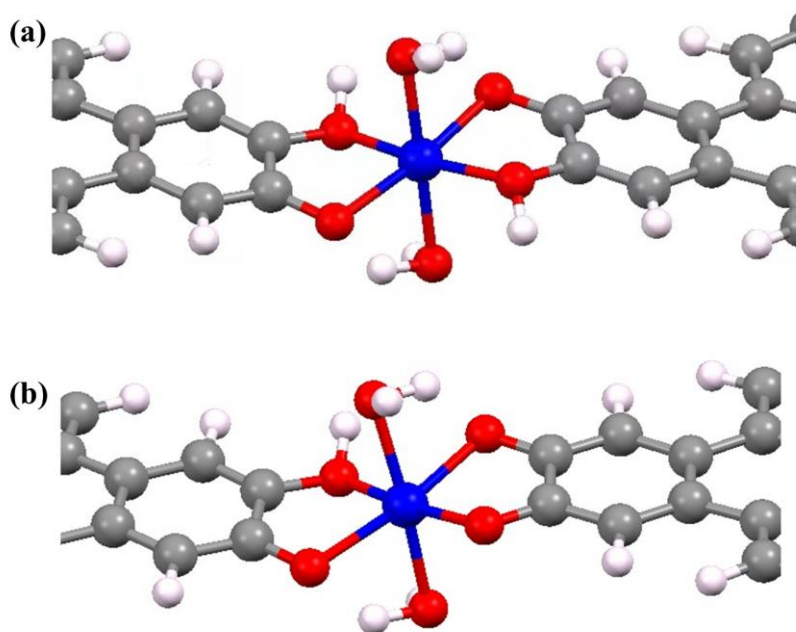

**Fig. S29** Optimized geometrical structures of (a) Ni-HHTP-CH and (b) Ni-HHTP-MH. The blue, red, white and grey colors refer to Ni, O, H and C atoms, respectively.

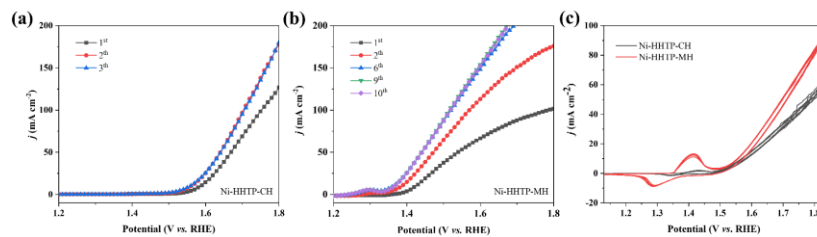

**Fig. S30** LSV curves of (a) the Ni-HHTP-CH and (b) the Ni-HHTP-MH; (c) Cyclic voltammetry curves of Ni-HHTP-MH and Ni-HHTP-CH.

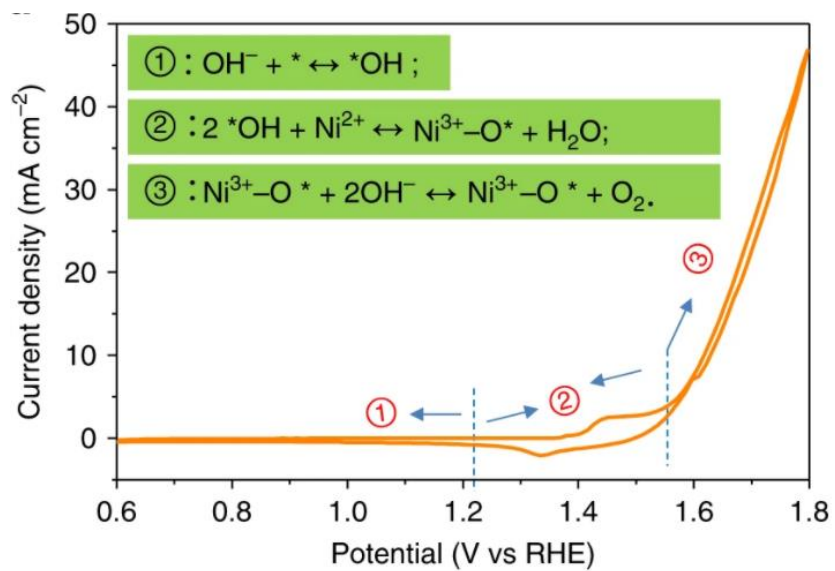

**Fig. S31** Cyclic voltammetry for Ni(OH)<sub>2</sub> at the potential range of 0.6–1.8 V<sup>3</sup>.

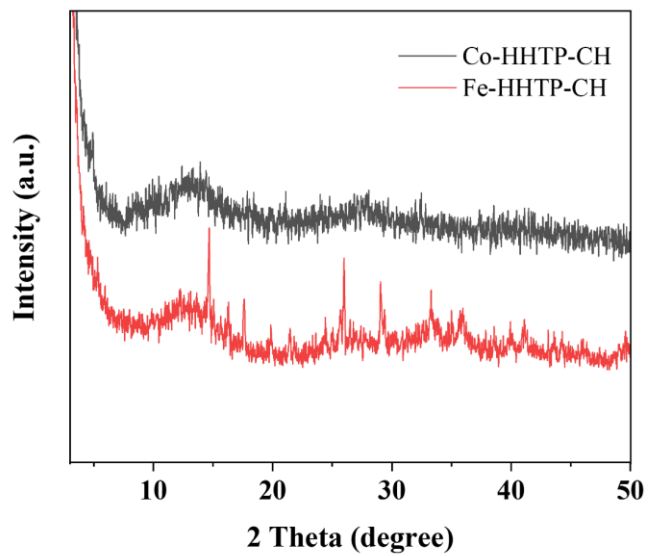

**Fig. S32** XRD patterns of Co-HHTP-CH and Fe-HHTP-CH.

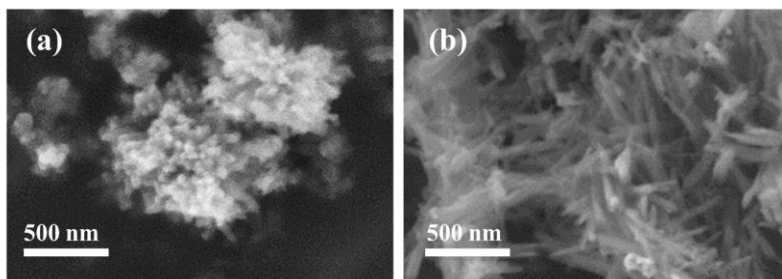

**Fig. S33** SEM images of Co-HHTP-MH and Fe-HHTP-MH.

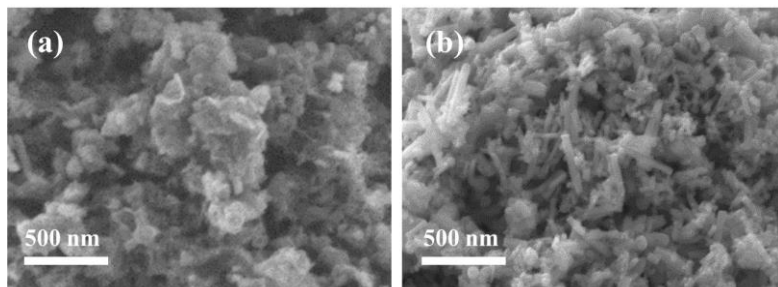

**Fig. S34** SEM images of Co-HHTP-CH and Fe-HHTP-CH.

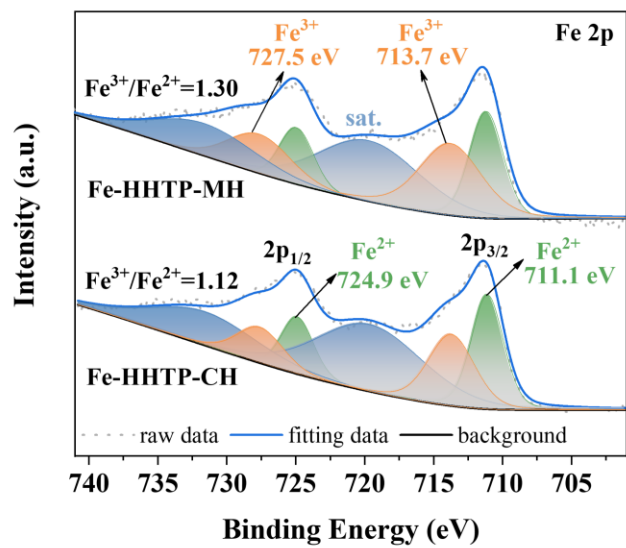

**Fig. S35** High-resolution Fe 2p XPS spectra of Fe-HHTP-MH and Fe-HHTP-CH.

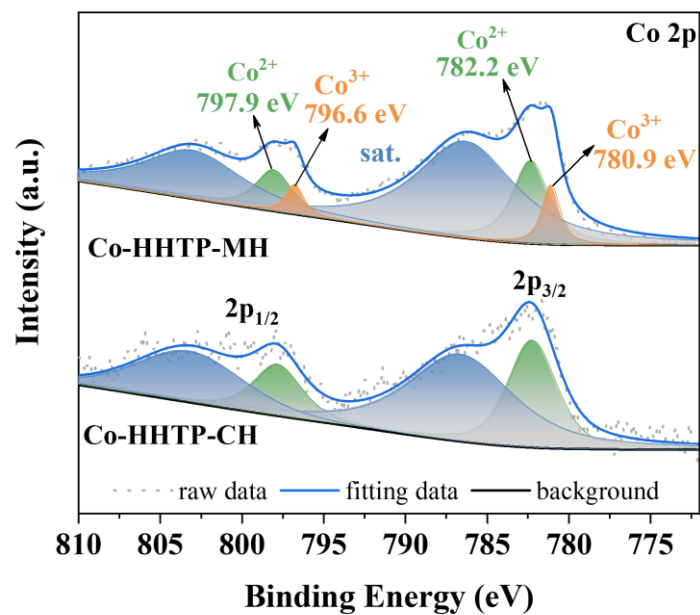

**Fig. S36** High-resolution Co 2p XPS spectra of Co-HHTP-MH and Co-HHTP-CH.



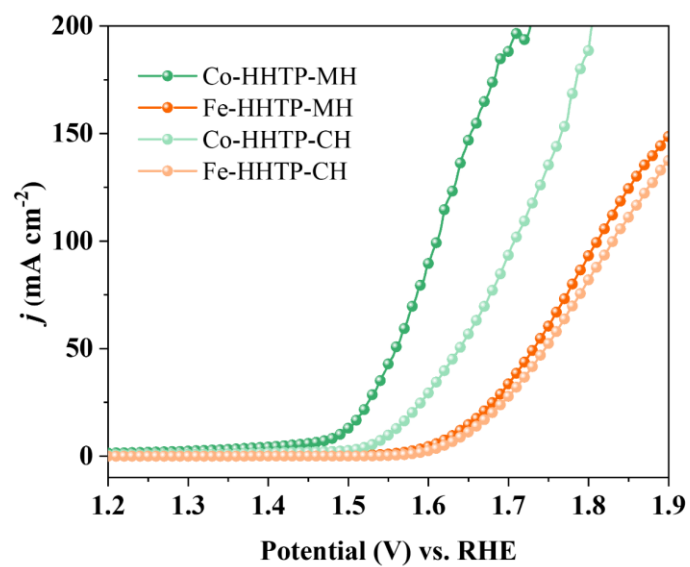

**Fig. S37** LSV curves of Co-HHTP-MH, Fe-HHTP-MH, Co-HHTP-CH and Fe-HHTP-CH.

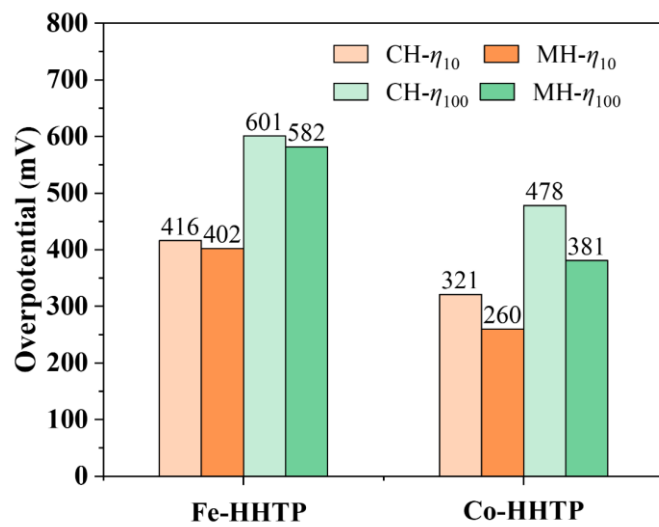

**Fig. S38**  $\eta_{10}$  and  $\eta_{100}$  of Co-HHTP-MH, Fe-HHTP-MH, Co-HHTP-CH and Fe-HHTP-CH.

**Table S1** The EIS results of Ni-HHTP-MH and Ni-HHTP-CH in 1.0 M KOH solution.

| Sample     | $R_s$ ( $\Omega$ ) | $R_1$ ( $\Omega$ ) | $R_{ct}$ ( $\Omega$ ) | CPE (mF) | $CPE_1$ (mF) |
|------------|--------------------|--------------------|-----------------------|----------|--------------|
| Ni-HHTP-MH | 1.313              | 4.58               | 17.0                  | 15.75    | 2.243        |
| Ni-HHTP-CH | 1.564              | 1.67               | 33.5                  | 8.64     | 1.781        |

**Table S2** TOF was calculated from the ICP results.

| Sample     | n ( $10^{-6}$ mmol)<br>based on ICP results | TOF calculated from n based on<br>ICP results ( $s^{-1}$ ) |
|------------|---------------------------------------------|------------------------------------------------------------|
| Ni-HHTP-MH | 4.56                                        | 0.062                                                      |
| Ni-HHTP-CH | 4.40                                        | 0.002                                                      |

**Table S3** Comparisons of the recently reported OER electrocatalysts based on metal-organic frameworks in alkaline solution.

| Catalyst                                    | Scan rate<br>(mV s <sup>-1</sup> ) | $\eta_{10}$<br>(mV) | $\eta_{100}$<br>(mV) | Tafel slop<br>(mV dec <sup>-1</sup> ) | Substrate | Ref.      |
|---------------------------------------------|------------------------------------|---------------------|----------------------|---------------------------------------|-----------|-----------|
| Ni-HHTP-MH                                  | 5                                  | 136                 | 286                  | 80.3                                  | CFP       | This work |
| NiFe-NFF                                    | 5                                  | 227                 | 253                  | 38.9                                  | NFF       | 4         |
| Pt-NC/Ni-MOF                                | 5                                  | 292                 | -                    | -                                     | GCE       | 5         |
| Ni-Fe-MOF                                   | 5                                  | 221                 | 320                  | 56.0                                  | GCE       | 6         |
| CoBDC-Fc-NF                                 | 2                                  | 178                 | 241                  | 51.0                                  | NF        | 7         |
| MCCF/NiMn-MOFs                              | 5                                  | 280                 | -                    | 86.0                                  | CP        | 8         |
| CoNi-MOFNA                                  | 5                                  | 215                 | 250                  | 51.6                                  | CNF       | 9         |
| FeCo-MOF-EH                                 | 2                                  | 301                 | -                    | 42.0                                  | CFP       | 10        |
| M-PCBN/CC                                   | 5                                  | 232                 | 270                  | 32.0                                  | CC        | 11        |
| Ni <sub>0.5</sub> Co <sub>0.5</sub> -MOF-74 | 5                                  | 198                 | -                    | 49.0                                  | GCE       | 12        |
| CoCu-MOF NBs.                               | 5                                  | 271                 | 334                  | 63.5                                  | CP        | 13        |
| 2D MOF-Fe/Co(1:2)                           | 10                                 | 238                 | 330                  | 52.0                                  | GCE       | 14        |
| Co-LDH@ZIF-67                               | 5                                  | 187                 | 310                  | 59.0                                  | CC        | 15        |
| NiFc-MOF/NF                                 | 10                                 | 195                 | 241                  | 48.5                                  | NF        | 16        |
| NiFe-MOF/G                                  | 5                                  | 258                 | 328                  | 49.0                                  | GCE       | 17        |
| NiFe-MOF                                    | 5                                  | 215                 | 263                  | 49.1                                  | CFC       | 18        |
| Fe-Co-Ni MOF                                | 5                                  | 254                 | 406                  | 51.3                                  | NF        | 19        |
| Ni-BDC-1R                                   | 0.5                                | 225                 | 350                  | 89.0                                  | NF        | 20        |
| MIL-53(Fe)-2OH                              | 1                                  | 215                 | 270                  | 45.4                                  | NF        | 21        |
| Ni <sub>2</sub> Fe <sub>1</sub> Sq-zbr-MOF  | 5                                  | 230                 | 270                  | 37.7                                  | CP        | 22        |
| NiYCe-MOF/NF                                | 5                                  | 245                 | 264                  | 65.0                                  | NF        | 23        |

The  $\eta_{10}$  and  $\eta_{100}$  were overpotential at current density of 10 and 100 mA cm<sup>-2</sup>; CFP: carbon fiber paper; NFF: NiFe alloy foam; GCE: glassy carbon electrode; NF: nickel foam; CP: carbon paper; CNF: Co<sub>9</sub>Ni<sub>1</sub> foam; CC: carbon cloth; CFC: carbon fiber cloth.

**Table S4** Comparisons of OER performance of our catalysts to the most active catalysts reported recently in alkaline solution.

| Catalyst                                  | Scan rate<br>(mV s <sup>-1</sup> ) | $\eta_{10}$<br>(mV) | $\eta_{100}$<br>(mV) | Tafel slop<br>(mV dec <sup>-1</sup> ) | Substrate | Ref.      |
|-------------------------------------------|------------------------------------|---------------------|----------------------|---------------------------------------|-----------|-----------|
| Ni-HHTP-MH                                | 5                                  | 136                 | 286                  | 80.3                                  | CFP       | This work |
| NiFe-P <sub>Zn</sub> @PNTA                | 5                                  | 172                 | ~290                 | 50.0                                  | PNTA      | 24        |
| NiOOH/(LDH/ $\alpha$ -FeOOH)              | 5                                  | 195                 | 250                  | 35.0                                  | NF        | 25        |
| TMB@NiNC                                  | 1                                  | 208                 | 230                  | 41.4                                  | NF        | 26        |
| FeCoNiS <sub>x</sub>                      | 1                                  | 202                 | 255                  | 47.0                                  | NF        | 27        |
| CoP/Fe-Co <sub>9</sub> S <sub>8</sub>     | 5                                  | 156                 | ~250                 | 41.7                                  | NF        | 28        |
| Ce-NiFe                                   | 5                                  | 195                 | ~232                 | 22.8                                  | NFF       | 29        |
| Fe@MoS <sub>2</sub> -C                    | 5                                  | 194                 | ~325                 | 63.0                                  | NF        | 30        |
| Ni-Gr-CNTs-Sn <sub>4</sub> P <sub>3</sub> | 5                                  | 169@20              | 375                  | 88.0                                  | NF        | 31        |
| Au/ULDH-NiFe                              | 5                                  | 189                 | -                    | 35.0                                  | GCE       | 32        |
| W-NiS <sub>0.5</sub> Se <sub>0.5</sub>    | 5                                  | 171                 | 239                  | 41.0                                  | NF        | 33        |
| NiFeV nanofiber                           | 10                                 | 181                 | 269                  | 47.0                                  | CC        | 34        |
| Ru-NiCo <sub>2</sub> S <sub>4-x</sub>     | 2                                  | 190@50              | ~330                 | 61.3                                  | NF        | 35        |
| Ir/CoNiB                                  | 1                                  | 178                 | 242                  | 35.1                                  | NF        | 36        |
| Ir <sub>SA</sub> -Ni <sub>2</sub> P       | 5                                  | 149                 | ~252                 | 90.1                                  | GCE       | 37        |

The  $\eta_{10}$  and  $\eta_{100}$  were overpotential at current density of 10 and 100 mA cm<sup>-2</sup>; CFP: carbon fiber paper; PNTA: porous nickel tube arrays; NF: nickel foam; NFF: NiFe alloy foam; GCE: glassy carbon electrode; CC: carbon cloth.

## Reference

1. L. Yang, X. He and M. Dinca, *J. Am. Chem. Soc.*, 2019, **141**, 10475-10480.
2. Q. Lv, Z. Zhu, Y. Ni, J. Geng and F. Li, *Angew. Chem. Int. Ed.*, 2022, **61**, e202114293.
3. J. Q. Yan, L. Q. Kong, Y. J. Ji, J. White, Y. Y. Li, J. Zhang, P. F. An, S. Z. Liu, S. T. Lee and T. Y. Ma, *Nature Commun.*, 2019, **10**, 2149.
4. C. Cao, D.-D. Ma, Q. Xu, X.-T. Wu and Q.-L. Zhu, *Adv. Funct. Mater.*, 2019, **29**, 1807418.
5. C. X. Guo, Y. Jiao, Y. Zheng, J. Luo, K. Davey and S. Z. Qiao, *Chem*, 2019, **5**, 2429-2441.
6. F.-L. Li, P. Wang, X. Huang, D. J. Young, H.-F. Wang, P. Braunstein and J.-P. Lang, *Angew. Chem. Int. Ed.*, 2019, **58**, 7051-7056.
7. Z. Xue, K. Liu, Q. Liu, Y. Li, M. Li, C.-Y. Su, N. Ogiwara, H. Kobayashi, H. Kitagawa, M. Liu and G. Li, *Nat. Commun.*, 2019, **10**, 5048.
8. W. Cheng, X. F. Lu, D. Luan and X. W. Lou, *Angew. Chem. Int. Ed.*, 2020, **59**, 18234-18239.
9. L. Huang, G. Gao, H. Zhang, J. X. Chen, Y. X. Fang and S. J. Dong, *Nano Energy*, 2020, **68**, 104296.
10. J. Tian, F. Jiang, D. Yuan, L. Zhang, Q. Chen and M. Hong, *Angew. Chem. Int. Ed.*, 2020, **59**, 13101-13108.
11. W. Zhang, Y. Wang, H. Zheng, R. Li, Y. Tang, B. Li, C. Zhu, L. You, M.-R. Gao, Z. Liu, S.-H. Yu and K. Zhou, *ACS Nano*, 2020, **14**, 1971-1981.
12. S. Zhao, C. Tan, C.-T. He, P. An, F. Xie, S. Jiang, Y. Zhu, K.-H. Wu, B. Zhang, H. Li, J. Zhang, Y. Chen, S. Liu, J. Dong and Z. Tang, *Nat. Energy*, 2020, **5**, 881-890.
13. W. Cheng, Z.-P. Wu, D. Luan, S.-Q. Zang and X. W. Lou, *Angew. Chem. Int. Ed.*, 2021, **60**, 26397-26402.
14. K. Ge, S. Sun, Y. Zhao, K. Yang, S. Wang, Z. Zhang, J. Cao, Y. Yang, Y. Zhang, M. Pan and L. Zhu, *Angew. Chem. Int. Ed.*, 2021, **60**, 12097-12102.
15. Z. Li, X. Zhang, Y. Kang, C. C. Yu, Y. Wen, M. Hu, D. Meng, W. Song and Y. Yang, *Adv. Sci.*, 2021, **8**.
16. J. Liang, X. Gao, B. Guo, Y. Ding, J. Yan, Z. Guo, E. C. M. Tse and J. Liu, *Angew. Chem. Int. Ed.*, 2021, **60**, 12770-12774.
17. Y. Wang, B. Liu, X. Shen, H. Arandiyani, T. Zhao, Y. Li, M. Garbrecht, Z. Su, L. Han, A. Tricoli and C. Zhao, *Adv. Energy Mater.*, 2021, **11**, 2003759.
18. J. Zhou, Z. Han, X. Wang, H. Gai, Z. Chen, T. Guo, X. Hou, L. Xu, X. Hu, M. Huang, S. V. Levchenko and H. Jiang, *Adv. Funct. Mater.*, 2021, **31**, 2102066.
19. F. S. Farahani, M. S. Rahmanifar, A. Noori, M. F. El-Kady, N. Hassani, M. Neek-Amal, R. B. Kaner and M. F. Mousavi, *J. Am. Chem. Soc.*, 2022, **144**, 3411-3428.
20. L. Zhang, J. Wang, K. Jiang, Z. Xiao, Y. Gao, S. Lin and B. Chen, *Angew. Chem. Int. Ed.*, 2022, **61**, e202214794.
21. C. Zhang, Q. Qi, Y. Mei, J. Hu, M. Sun, Y. Zhang, B. Huang, L. Zhang and S. Yang, *Adv. Mater.*, 2022, e2208904.
22. S. Kandambeth, V. S. Kale, D. Fan, J. A. Bau, P. M. Bhatt, S. Zhou, A. Shkurenko, M. Rueping, G. Maurin, O. Shekhah and M. Eddaoudi, *Adv. Energy Mater.*, 2022, **13**, 2202964.
23. F. Li, M. Jiang, C. Lai, H. Xu, K. Zhang and Z. Jin, *Nano Lett.*, 2022, **22**, 7238-7245.
24. Y. Zhou, N. Jin, Y. Ma, Y. Cui, L. Wang, Y. Kwon, W. K. Lee, W. Zhang, H. Ge and J. Zhang, *Adv. Mater.*, 2022, e2209500.
25. M. Cai, Q. Zhu, X. Wang, Z. Shao, L. Yao, H. Zeng, X. Wu, J. Chen, K. Huang and S. Feng, *Adv. Mater.*, 2022, e2209338.
26. M. Moloudi, A. Noori, M. S. Rahmanifar, Y. Shabangoli, M. F. El-Kady, N. B. Mohamed, R. B. Kaner and M. F. Mousavi, *Adv. Energy Mater.*, 2022, **13**, 2203002.
27. A. Wang, X. Zhang, S. Gao, C. Zhao, S. Kuang, S. Lu, J. Niu, G. Wang, W. Li, D. Chen, H. Zhang, X. Zhou, S. Zhang, B. Zhang and W. Wang, *Adv. Mater.*, 2022, **34**, e2204247.
28. X. Chen, Y. Cheng, Y. Wen, Y. Wang, X. Yan, J. Wei, S. He and J. Zhou, *Adv. Sci.*, 2022, **9**, e2204742.
29. J. Liu, Y. Liu, X. Mu, H. Jang, Z. Lei, S. Jiao, P. Yan, M. G. Kim and R. Cao, *Adv. Funct. Mater.*, 2022, **32**, 2204086.
30. F. Gong, M. Liu, L. Gong, S. Ye, Q. Jiang, G. Zeng, X. Zhang, Z. Peng, Y. Zhang, S. Fang and J. Liu, *Adv. Funct. Mater.*, 2022, **32**, 2202141.

31. S. Riyajuddin, M. Pahuja, P. K. Sachdeva, K. Azmi, S. Kumar, M. Afshan, F. Ali, J. Sultana, T. Maruyama, C. Bera and K. Ghosh, *ACS Nano*, 2022, **16**, 4861-4875.
32. S. Kitano, T. G. Noguchi, M. Nishihara, K. Kamitani, T. Sugiyama, S. Yoshioka, T. Miwa, K. Yoshizawa, A. Staykov and M. Yamauchi, *Adv. Mater.*, 2022, **34**, e2110552.
33. Y. Wang, X. Li, M. Zhang, J. Zhang, Z. Chen, X. Zheng, Z. Tian, N. Zhao, X. Han, K. Zaghib, Y. Wang, Y. Deng and W. Hu, *Adv. Mater.*, 2022, **34**, e2107053.
34. B. Zhang, Z. Wu, W. Shao, Y. Gao, W. Wang, T. Ma, L. Ma, S. Li, C. Cheng and C. Zhao, *Angew. Chem. Int. Ed.*, 2022, **61**, e202115331.
35. H. Su, S. Song, Y. Gao, N. Li, Y. Fu, L. Ge, W. Song, J. Liu and T. Ma, *Adv. Funct. Mater.*, 2021, **32**, 2109731.
36. C. Wang, P. Zhai, M. Xia, Y. Wu, B. Zhang, Z. Li, L. Ran, J. Gao, X. Zhang, Z. Fan, L. Sun and J. Hou, *Angew. Chem. Int. Ed.*, 2021, **60**, 27126-27134.
37. Q. Wang, Z. Zhang, C. Cai, M. Wang, Z. L. Zhao, M. Li, X. Huang, S. Han, H. Zhou, Z. Feng, L. Li, J. Li, H. Xu, J. S. Francisco and M. Gu, *J. Am. Chem. Soc.*, 2021, **143**, 13605-13615.
